# Supplementary material
Source: PubMed Central journal article supplement (PMC9523592)
Supplement: NIHMS1830947-supplement-Supplemental_Material.pdf [file NIHMS1830947-supplement-Supplemental_Material.pdf]

## Appendix 1

Sinus node modification is usually performed with conscious sedation, but general anesthesia can also be used without paralytics so that phrenic nerve stimulation and function can be monitored<sup>1</sup>. In addition to fluoroscopy, 3-dimensional mapping using electroanatomic mapping is recommended, from both procedural flow and safety perspectives. Unipolar mapping likely does not provide any significant difference in ability to localize sinus node activation compared to bipolar mapping<sup>2,3</sup>. Other imaging guidance such as intracardiac echocardiography may facilitate catheter location and tissue contact, while also providing awareness of complications such as perforation and stenosis of the SVC<sup>1,4-7</sup>. For ablation catheters, while 4-mm tip electrode catheter may provide more accurate mapping, larger non-irrigated or irrigated catheters are recommended to deliver deeper lesions from the endocardial surface and may be more effective particularly along the terminal crest<sup>8-10</sup>. With these temperature control systems, the power should be set to achieve 50-60° C temperatures at the catheter tip during ablation. If an irrigated catheter is used, the radiofrequency (RF) power is typically set at 30-40 W, but lower wattage such as 20 W can be used initially and titrated up to goal every few seconds in cases where the phrenic nerve is in close proximity to the ablation site. Applications of RF energy usually are delivered for 60 seconds<sup>1,11</sup>.

To move the exit of the sinus node impulses more superiorly, isoproterenol infusion is more predictable than bolus delivery, with the required infusion rate usually being 2 mcg/min, but up to 10 mcg/min has been used<sup>1,3,6,12-14</sup>. The course of the phrenic nerve can be mapped with the ablation catheter using high output pacing, at least 10 mA output with 2 ms pulse width.<sup>15</sup> Tagging of the phrenic nerve sites using 3-dimensional mapping can be accomplished altogether prior to mapping of the sinus node, but confirmed absence of phrenic nerve capture should be done before each potential ablation site for IST<sup>1</sup>. An electrophysiology catheter can be positioned to pace the phrenic nerve while ablating, thereby providing another method to monitor phrenic nerve function.

The electrograms at potential ablation sites should precede the sinus tachycardia P wave by 25 msec. If unipolar mapping is used, the unipolar electrogram should show a 'QS' configuration timing in onset with the bipolar electrogram<sup>1</sup>. With delivery of RF energy, the sinus rate may increase or an accelerated junctional rhythm can occur<sup>1,6</sup>. Typically with ablation, the focus will migrate inferiorly down the right

atrium, an average of 23 +/- 11 mm requiring repeat mapping and ablation eventually covering a length of 19-23 mm<sup>4, 12, 16</sup>. Ablation in adjacent tissue, such as the arcuate ridge may be required<sup>8, 17</sup>.

## References

1. Gianni C, Di Biase L, Mohanty S, Gokoglan Y, Gunes MF, Horton R, Hranitzky PM, Burkhardt JD and Natale A. Catheter ablation of inappropriate sinus tachycardia. *J Interv Card Electrophysiol*. 2016;46:63-9.
2. Bonhomme CE, Deger FT, Schultz J and Hsu SS. Radiofrequency catheter ablation using non-contact mapping for inappropriate sinus tachycardia. *J Interv Card Electrophysiol*. 2004;10:159-63.
3. Lin D, Garcia F, Jacobson J, Gerstenfeld EP, Dixit S, Verdino R, Callans DJ and Marchlinski FE. Use of noncontact mapping and saline-cooled ablation catheter for sinus node modification in medically refractory inappropriate sinus tachycardia. *Pacing Clin Electrophysiol*. 2007;30:236-42.
4. Marrouche NF, Beheiry S, Tomassoni G, Cole C, Bash D, Dresing T, Saliba W, Abdul-Karim A, Tchou P, Schweikert R, Leonelli F and Natale A. Three-dimensional nonfluoroscopic mapping and ablation of inappropriate sinus tachycardia. Procedural strategies and long-term outcome. *J Am Coll Cardiol*. 2002;39:1046-54.
5. Callans DJ, Ren JF, Schwartzman D, Gottlieb CD, Chaudhry FA and Marchlinski FE. Narrowing of the superior vena cava-right atrium junction during radiofrequency catheter ablation for inappropriate sinus tachycardia: analysis with intracardiac echocardiography. *J Am Coll Cardiol*. 1999;33:1667-70.
6. Lee RJ, Kalman JM, Fitzpatrick AP, Epstein LM, Fisher WG, Olgin JE, Lesh MD and Scheinman MM. Radiofrequency catheter modification of the sinus node for "inappropriate" sinus tachycardia. *Circulation*. 1995;92:2919-28.
7. Ren JF, Marchlinski FE, Callans DJ and Zado ES. Echocardiographic lesion characteristics associated with successful ablation of inappropriate sinus tachycardia. *J Cardiovasc Electrophysiol*. 2001;12:814-8.
8. Koplan BA, Parkash R, Couper G and Stevenson WG. Combined epicardial-endocardial approach to ablation of inappropriate sinus tachycardia. *J Cardiovasc Electrophysiol*. 2004;15:237-40.
9. Mantovan R, Thiene G, Calzolari V and Basso C. Sinus node ablation for inappropriate sinus tachycardia. *J Cardiovasc Electrophysiol*. 2005;16:804-6.
10. Rubenstein JC, Kim MH and Jacobson JT. A novel method for sinus node modification and phrenic nerve protection in resistant cases. *J Cardiovasc Electrophysiol*. 2009;20:689-91.
11. Man KC, Knight B, Tse HF, Pelosi F, Michaud GF, Flemming M, Strickberger SA and Morady F. Radiofrequency catheter ablation of inappropriate sinus tachycardia guided by activation mapping. *J Am Coll Cardiol*. 2000;35:451-7.
12. Beaver TM, Miles WM, Conti JB, Kogan A, Burkart TA, Woo GW and Saxonhouse SJ. Minimally invasive ablation of a migrating focus of inappropriate sinus tachycardia. *J Thorac Cardiovasc Surg*. 2010;139:506-7.
13. Jacobson JT, Kraus A, Lee R and Goldberger JJ. Epicardial/endocardial sinus node ablation after failed endocardial ablation for the treatment of inappropriate sinus tachycardia. *J Cardiovasc Electrophysiol*. 2014;25:236-41.
14. Takemoto M, Mukai Y, Inoue S, Matoba T, Nishizaka M, Ide T, Chishaki A and Sunagawa K. Usefulness of non-contact mapping for radiofrequency catheter ablation of inappropriate sinus tachycardia: new procedural strategy and long-term clinical outcome. *Intern Med*. 2012;51:357-62.
15. Rodriguez-Manero M, Kreidieh B, Al Rifai M, Ibarra-Cortez S, Schurmann P, Alvarez PA, Fernandez-Lopez XA, Garcia-Seara J, Martinez-Sande L, Gonzalez-Juanatey JR and Valderrabano M.

Ablation of Inappropriate Sinus Tachycardia: A Systematic Review of the Literature. *JACC Clin Electrophysiol.* 2017;3:253-265.

16. Frankel DS, Lin D, Anastasio N, Mountantonakis SE, Dixit S, Gerstenfeld EP, Hutchinson MD, Riley MP, Marchlinski FE and Callans DJ. Frequent additional tachyarrhythmias in patients with inappropriate sinus tachycardia undergoing sinus node modification: an important cause of symptom recurrence. *J Cardiovasc Electrophysiol.* 2012;23:835-9.

17. Killu AM, Syed FF, Wu P and Asirvatham SJ. Refractory inappropriate sinus tachycardia successfully treated with radiofrequency ablation at the arcuate ridge. *Heart Rhythm.* 2012;9:1324-7.
